# Supplementary material for: Field durability of the same type of long-lasting insecticidal net varies between regions in Nigeria due to differences in household behaviour and living conditions
Source: PubMed Central journal article supplement (PMC4376338; doi:10.1186/s12936-015-0640-4), 2015-03-24
Supplement: 12936_2015_640_MOESM1_ESM.pdf [file 12936_2015_640_MOESM1_ESM.pdf]

### Additional file 3

**Table 9:** Households sampled and nets assessed at different locations and time points

| Location and Year      | Years since campaign | Households |              | Campaign nets |                    |
|------------------------|----------------------|------------|--------------|---------------|--------------------|
|                        |                      | Target     | Sampled      | Found         | Assessed for holes |
| Zamfara (Shinkafi LGA) |                      |            |              |               |                    |
| Year 1                 | 1.1                  | 300        | 300 (100%)   | 734           | 715 (97.4%)        |
| Year 2                 | 2.1                  | 300        | 291 (97.0%)  | 493           | 489 (99.2%)        |
| Year 3                 | 3.1                  | 300        | 298 (99.3%)  | 461           | 435 (94.4%)        |
| Zamfara Total          | n.a.                 | 900        | 889 (98.8%)  | 1688          | 1639 (97.1%)       |
| Nasarawa (Toto LGA)    |                      |            |              |               |                    |
| Year 1                 | 1.2                  | 300        | 278 (92.7%)  | 457           | 425 (93.0%)        |
| Year 2                 | 2.3                  | 300        | 299 (99.7%)  | 482           | 463 (96.1%)        |
| Year 3                 | 3.3                  | 420        | 412 (98.1%)  | 560           | 522 (93.2%)        |
| Sub-Total              | n.a.                 | 1020       | 989 (97.0%)  | 1499          | 1410 (94.1%)       |
| Nasarawa (Kokona LGA*) |                      |            |              |               |                    |
| Year 1                 | 1.2                  | 300        | 276 (92.0%)  | 397           | 376 (94.7%)        |
| Year 2                 | 2.3                  | 300        | 297 (99.0%)  | 436           | 410 (94.0%)        |
| Year 3                 | 3.3                  | 300        | 297 (99.0%)  | 358           | 327 (91.3%)        |
| Sub-Total              | n.a.                 | 900        | 870 (96.7%)  | 1191          | 1113 (93.5%)       |
| Nasarawa Total         | n.a.                 | 1920       | 1859 (96.8%) | 2690          | 2523 (93.8%)       |
| Cross River (Abi LGA)  |                      |            |              |               |                    |
| Year 1                 | 1.1                  | 300        | 301 (100%)   | 482           | 398 (82.6%)        |
| Year 2                 | 2.2                  | 300        | 300 (100%)   | 403           | 376 (93.3%)        |
| Year 3                 | 3.1                  | 300        | 300 (100%)   | 406           | 380 (93.6%)        |
| Cross River Total      | n.a.                 | 900        | 901 (100%)   | 1291          | 1154 (89.4%)       |
| Overall                |                      |            |              |               |                    |
| Year 1                 | n.a.                 | 1200       | 1155 (96.3%) | 2070          | 1914 (92.5%)       |
| Year 2                 | n.a.                 | 1200       | 1187 (98.9%) | 1814          | 1738 (95.8%)       |
| Year 3                 | n.a.                 | 1320       | 1307 (99.0%) | 1785          | 1664 (93.2%)       |
| Overall Total          | n.a.                 | 3720       | 3649 (98.1%) | 5669          | 5316 (93.8%)       |

\* Intervention site for care and repair study
