# Supplementary material for: Field durability of the same type of long-lasting insecticidal net varies between regions in Nigeria due to differences in household behaviour and living conditions
Source: Springer Nature journal article supplement (doi:10.1186/s12936-015-0640-4), 2015-03-23
Supplement: MOESM2 [file 9761156]

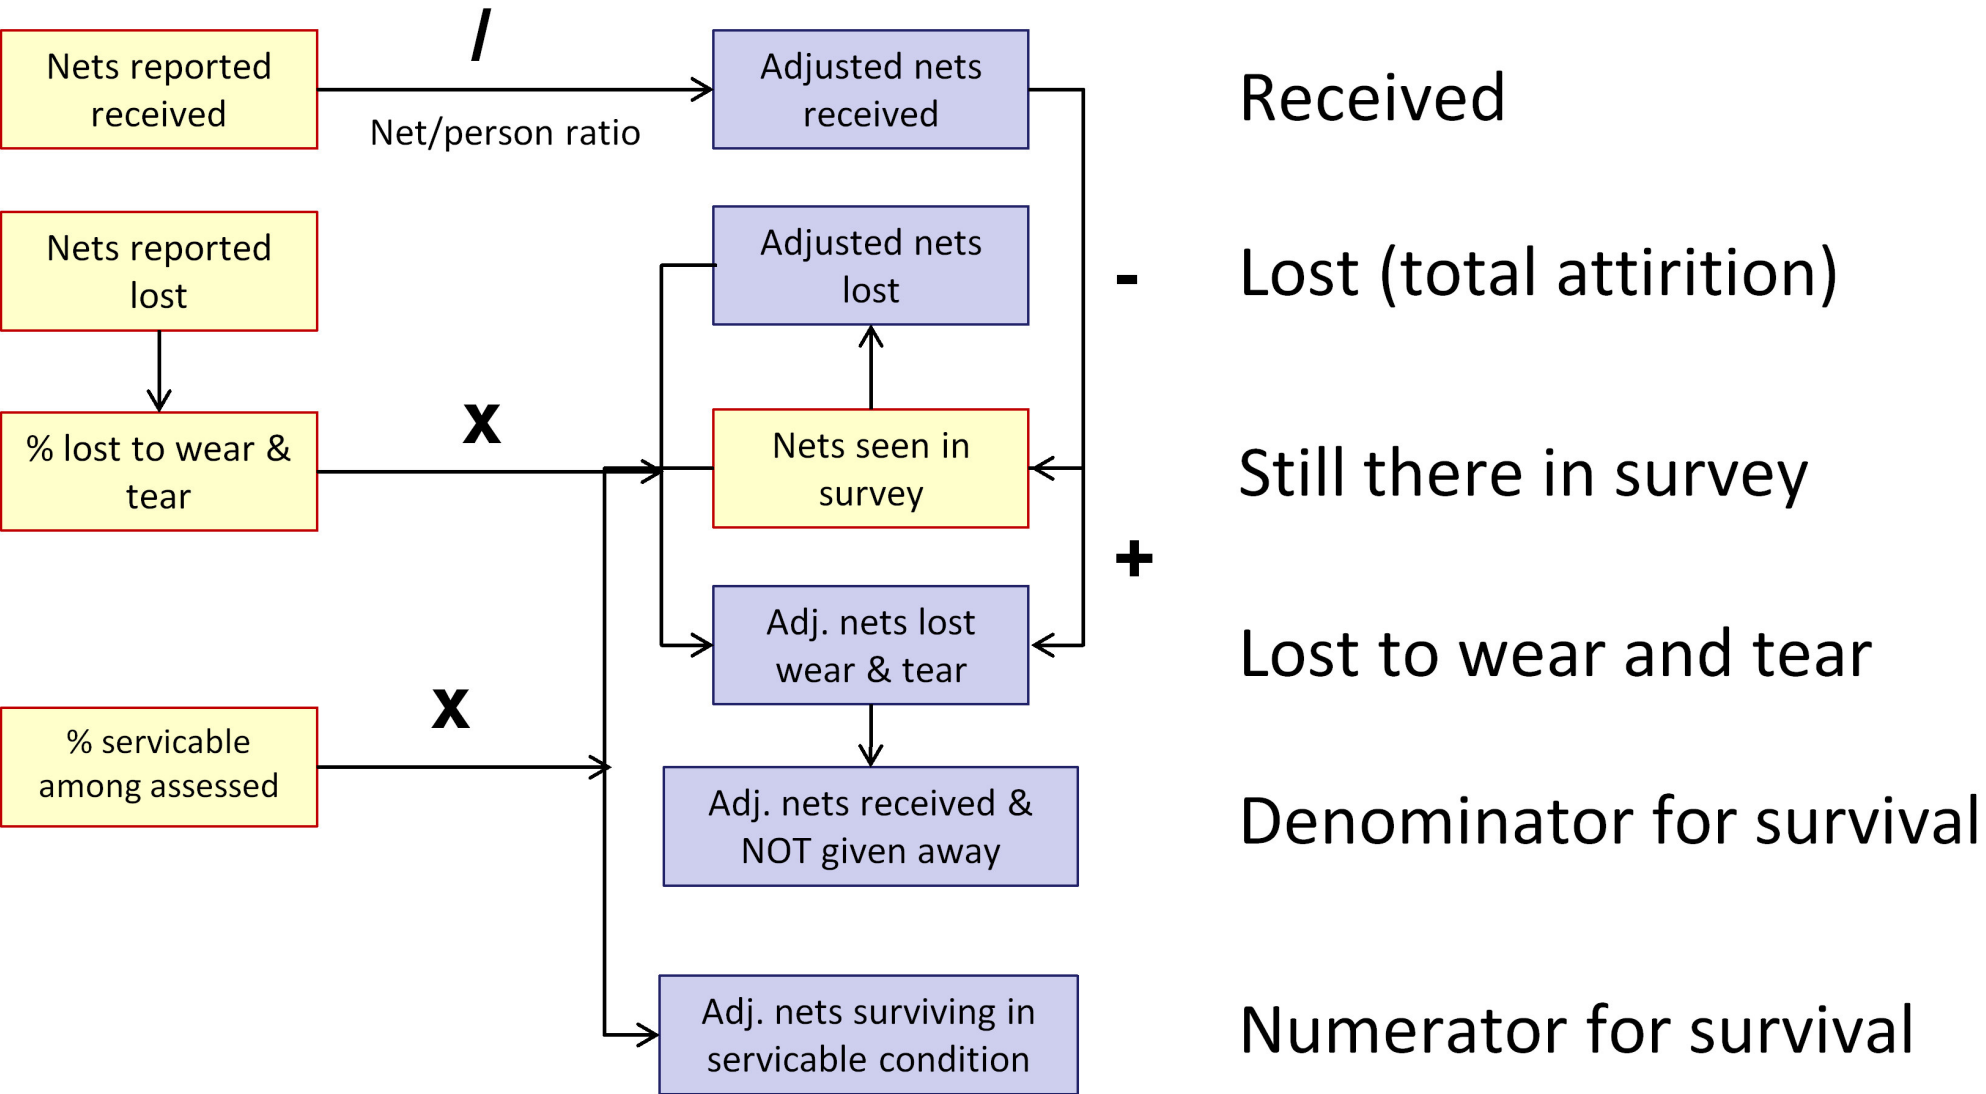

Received

Lost (total attrition)

Still there in survey

Lost to wear and tear

Denominator for survival

Numerator for survival

Calculate 95% CI from exact binomial inflated by design effect
