# Supplementary material for: Field durability of the same type of long-lasting insecticidal net varies between regions in Nigeria due to differences in household behaviour and living conditions
Source: Springer Nature journal article supplement (doi:10.1186/s12936-015-0640-4), 2015-03-23
Supplement: MOESM3 [file 9761156]

## Additional file 2

**Table 8:** Hypothetical loss functions with defined median survival. Shown are the percentages of originally distributed nets still present

| Median survival | Years since distribution |    |    |    |    |    |    |    |    |    |    |    |    |    |    |    |    |    |    |
|-----------------|--------------------------|----|----|----|----|----|----|----|----|----|----|----|----|----|----|----|----|----|----|
|                 | 0                        | 1  | 2  | 3  | 4  | 5  | 6  | 7  | 8  | 9  | 10 | 11 | 12 | 13 | 14 | 15 | 16 | 17 | 18 |
| 1-year          | 100                      | 50 | 4  | 0  |    |    |    |    |    |    |    |    |    |    |    |    |    |    |    |
| 1.5-year        | 100                      | 74 | 28 | 4  | 0  |    |    |    |    |    |    |    |    |    |    |    |    |    |    |
| 2-year          | 100                      | 85 | 50 | 19 | 4  | 0  |    |    |    |    |    |    |    |    |    |    |    |    |    |
| 2.5-year        | 100                      | 90 | 65 | 36 | 15 | 4  | 1  | 0  |    |    |    |    |    |    |    |    |    |    |    |
| 3-year          | 100                      | 93 | 74 | 50 | 28 | 12 | 4  | 1  | 0  |    |    |    |    |    |    |    |    |    |    |
| 3.5-year        | 100                      | 95 | 80 | 60 | 40 | 23 | 11 | 4  | 1  | 0  |    |    |    |    |    |    |    |    |    |
| 4-year          | 100                      | 96 | 84 | 68 | 50 | 33 | 19 | 10 | 4  | 2  | 0  |    |    |    |    |    |    |    |    |
| 4.5-year        | 100                      | 97 | 87 | 74 | 58 | 42 | 28 | 17 | 9  | 4  | 2  | 1  | 0  |    |    |    |    |    |    |
| 5-year          | 100                      | 97 | 90 | 78 | 64 | 50 | 36 | 24 | 15 | 8  | 4  | 2  | 1  | 0  |    |    |    |    |    |
| 5.5-year        | 100                      | 98 | 91 | 82 | 69 | 56 | 43 | 31 | 21 | 14 | 8  | 4  | 2  | 1  | 0  |    |    |    |    |
| 6-year          | 100                      | 98 | 93 | 85 | 74 | 62 | 50 | 39 | 29 | 20 | 13 | 8  | 5  | 3  | 1  | 1  | 0  |    |    |
| 6.5-year        | 100                      | 98 | 94 | 87 | 78 | 67 | 56 | 45 | 35 | 26 | 19 | 13 | 8  | 5  | 3  | 2  | 1  | 0  |    |
| 7-year          | 100                      | 99 | 95 | 88 | 80 | 71 | 61 | 50 | 41 | 32 | 24 | 17 | 12 | 8  | 5  | 3  | 2  | 1  | 0  |
