# Supplementary material for: Field durability of the same type of long-lasting insecticidal net varies between regions in Nigeria due to differences in household behaviour and living conditions
Source: Springer Nature journal article supplement (doi:10.1186/s12936-015-0640-4), 2015-03-23
Supplement: MOESM4 [file 9761156]

## Additional file 4

**Table 10:** House characteristics and socio-economic background by site (pooled data across all three surveys); Est.= estimate; HH=household; U5=child under five years

| Indicator                            | Zamfara<br>(N=896) |             | Nasarawa<br>(N=1896) |             | Cross River<br>(N=902) |             |
|--------------------------------------|--------------------|-------------|----------------------|-------------|------------------------|-------------|
|                                      | Est.               | 95% CI      | Est.                 | 95% CI      | Est.                   | 95% CI      |
| <b>House characteristics</b>         |                    |             |                      |             |                        |             |
| % of houses with sheet roof          | 32.4%              | 20.9 , 46.4 | 89.8%                | 82.9 , 94.2 | 85.1%                  | 80.7 , 88.7 |
| % of houses with brick/plaster walls | 15.6%              | 8.2 , 27.6  | 42.9%                | 37.3 , 48.6 | 75.6%                  | 69.0 , 81.2 |
| % of houses with earth/clay floors   | 74.4%              | 62.0 , 83.9 | 42.3%                | 35.4 , 49.5 | 24.0%                  | 18.9 , 29.9 |
| % of houses using firewood to cook   | 98.9%              | 95.6 , 99.7 | 99.0%                | 98.0 , 99.4 | 84.4%                  | 77.9 , 89.2 |
| % of HH with access to safe water    | 78.8%              | 69.8 , 85.6 | 24.2%                | 17.3 , 32.7 | 60.0%                  | 48.2 , 70.7 |
| % of HH with any latrine             | 85.4%              | 76.3 , 91.4 | 34.3%                | 28.0 , 41.2 | 72.0%                  | 65.4 , 77.7 |
| <b>Household assets</b>              |                    |             |                      |             |                        |             |
| % of HH owning a radio               | 81.9%              | 76.9 , 86.1 | 82.5%                | 79.0 , 85.5 | 74.2%                  | 69.7 , 78.2 |
| % of HH owning a mobile phone        | 63.6%              | 57.1 , 69.7 | 72.1%                | 67.9 , 76.0 | 76.6%                  | 72.3 , 80.4 |
| % of HH owning a TV                  | 14.1%              | 7.1 , 25.9  | 28.8%                | 24.6 , 33.4 | 65.2%                  | 58.9 , 71.0 |
| % of HH owning means of transport    | 63.2%              | 56.9 , 69.0 | 84.4%                | 81.0 , 87.4 | 53.9%                  | 49.5 , 58.3 |
| % of HH owning land                  | 95.0%              | 87.1 , 98.2 | 97.1%                | 95.0 , 98.4 | 89.0%                  | 85.3 , 91.9 |
| % of HH owning any husbandry         | 82.1%              | 72.1 , 89.1 | 90.8%                | 88.8 , 92.5 | 45.8%                  | 42.0 , 81.9 |
| <b>Household demographics</b>        |                    |             |                      |             |                        |             |
| % of HH polygamous                   | 75.9%              | 68.6 , 81.9 | 46.6%                | 42.9 , 50.4 | 43.7%                  | 37.7 , 49.9 |
| % of HH with any U5                  | 81.9%              | 78.4 , 85.0 | 75.0%                | 71.9 , 77.8 | 60.0%                  | 55.6 , 64.2 |
| <b>Education of head of HH</b>       |                    |             |                      |             |                        |             |
| Non-literate                         | 55.6%              | 47.0 , 63.8 | 52.4%                | 47.5 , 57.2 | 23.6%                  | 20.2 , 27.4 |
| Primary                              | 27.7%              | 20.8 , 35.8 | 20.6%                | 18.1 , 23.4 | 31.0%                  | 26.8 , 35.6 |
| Secondary or better                  | 16.7%              | 11.2 , 24.7 | 27.0%                | 23.5 , 30.9 | 45.3%                  | 40.1 , 50.7 |
